# Supplementary material for: TCR-engaging scaffolds selectively expand antigen-specific T-cells with a favorable phenotype for adoptive cell therapy
Source: PubMed Central journal article supplement — J Immunother Cancer. 2023 Aug 16;11(8):e006847. doi: 10.1136/jitc-2023-006847 (PMC10432666; doi:10.1136/jitc-2023-006847), 2023-08-16
Supplement: jitc-2023-006847supp001.pdf [file jitc-2023-006847supp001.pdf]

## Supplementary Figure S1

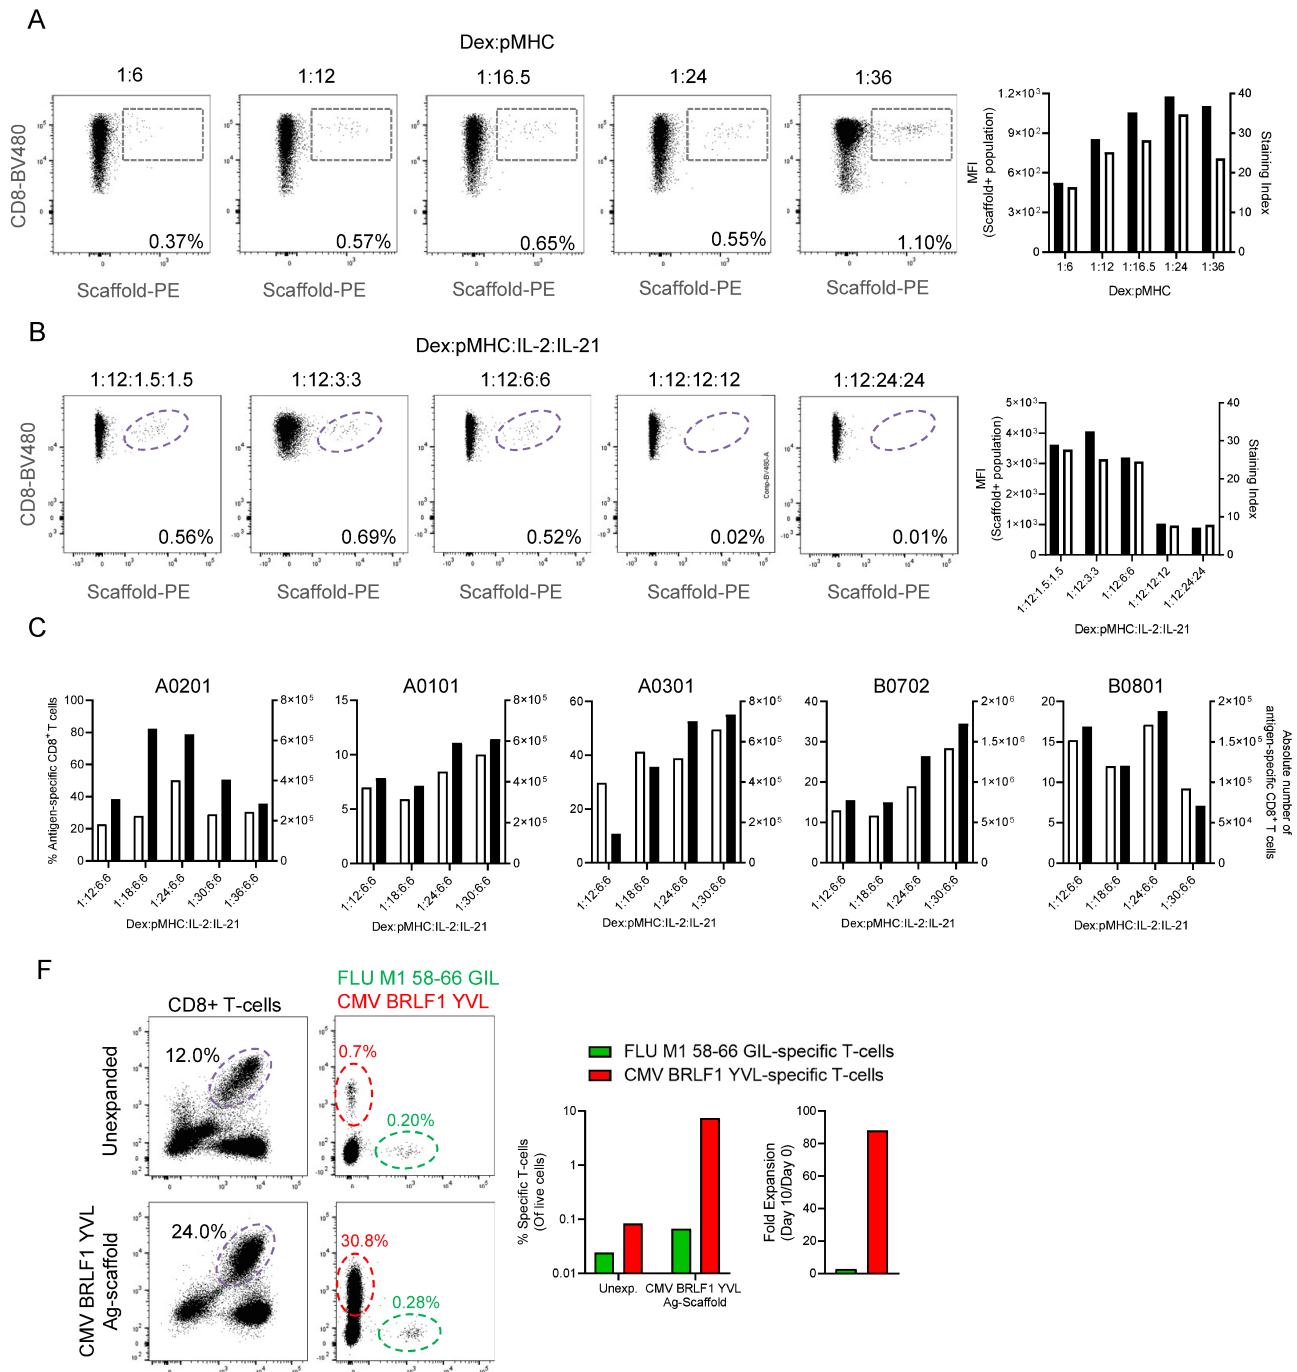

**Suppl. Figure S1 | Ag-scaffolds bind to specific T-cells via attached pMHC I and delivers co-attached co-stimulation and cytokines**

(A) Binding of PE-labeled dextran-backbone, with varying amounts of pMHCs, to HLA-A0101 CMV pp65 VTE-specific T-cells (~0.5%). Ratios were compared in median fluorescent intensity (MFI) and staining index (SI). CD8 T-cells were labeled with BV480. (B) T-cell binding of a 1:12 dextran:pMHC in combination with varying amounts of IL-2:IL-21 was compared based on MFI and SI (C) Frequency (left Y-axis) and number (right Y-axis) of HLA-A0201 CMV pp65 NLV-, HLA-A0101 CMV pp50 VTE-, HLA-A0301 FLU NP ILR-, HLA-B0702 CMV pp65 TPR-, HLA-B0801 EBV RAK-specific T-cells post-expansion with an unlabeled dextran backbone with varying amounts of pMHC and 6:6 IL-2:IL-21 (dextran:pMHC:IL-2:IL-21). (F) Frequency of CD8<sup>+</sup>, HLA-A0201 CMV BRLF1 YVL- (red) and FLU M1 58-66 GIL-specific T-cells (green) before and after expansion of healthy donor PBMCs with a CMV BRLF1 YVL Ag-scaffold. Expansion of FLU M1 58-66- (green) and CMV BRLF1 YVL-specific T-cells (red) was compared in % specific T-cells of total live cells and fold expansion (Day 10/Day 0).

## Supplementary Figure S2

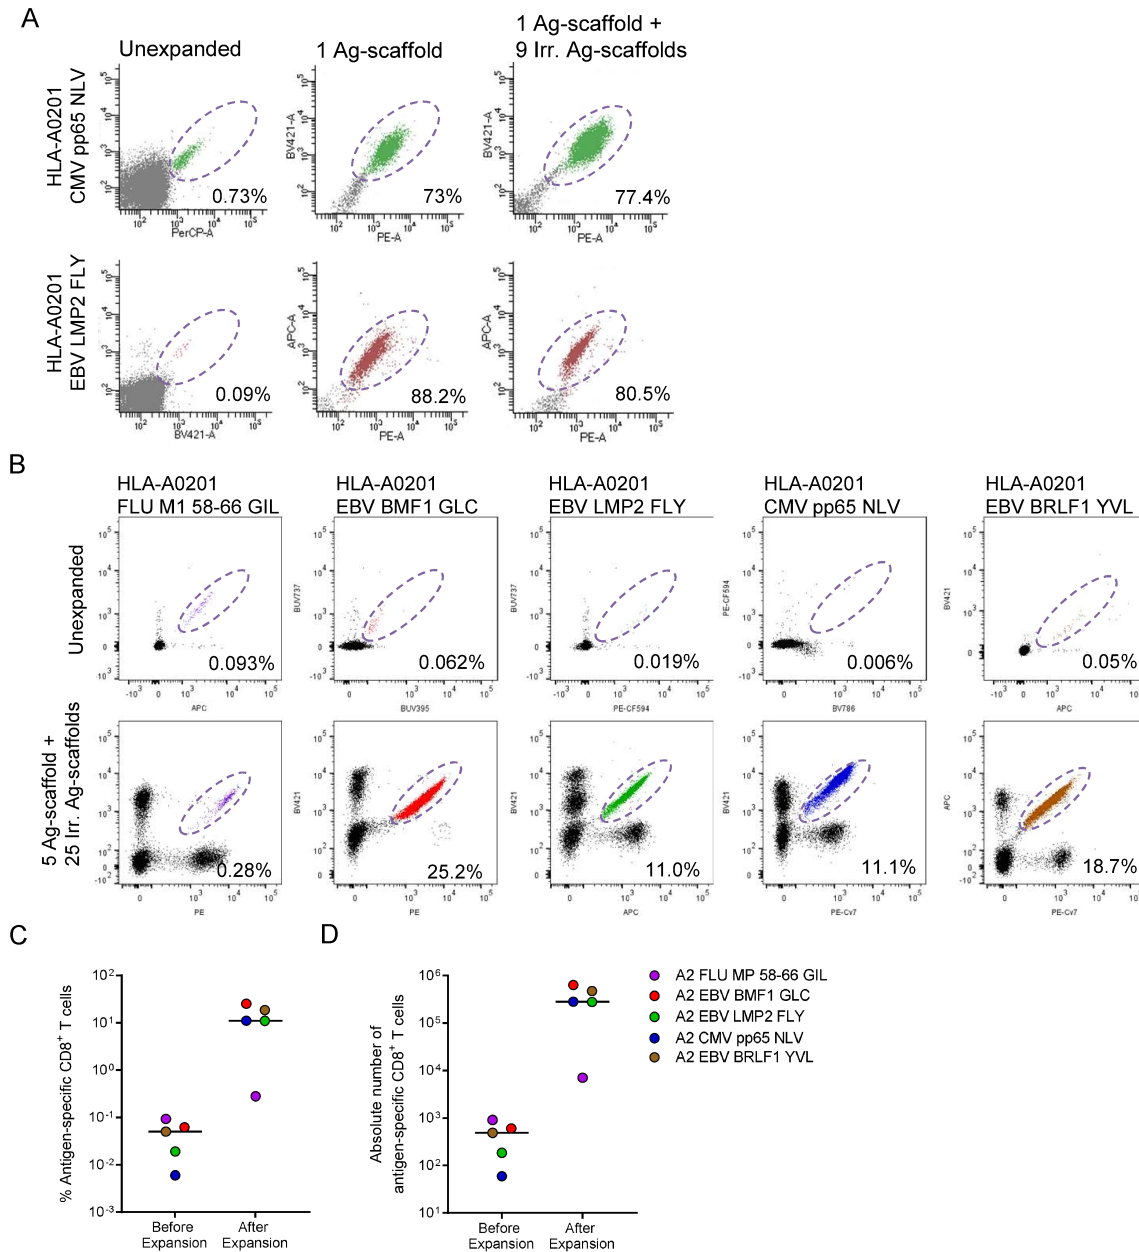

## Supplementary Figure S2 | Ag-scaffolds can expand multiple specificities simultaneously in one culture

**(A)** HLA-A0201 CMV pp65 NLV- (~0.73, green) and EBV LMP2 FLY-specific T cell populations (~0.09%, red) from one healthy donor were expanded in parallel using either a single relevant Ag-scaffold or a combination of one specific Ag-scaffold and nine Ag-scaffolds with irrelevant pMHC in 1/10 of the standard Ag-scaffold concentration. Specific T cells were marked with tetramer staining with varying color-combinations. **(B)** HLA-A0201 FLU MP 58-66 GIL- (~0.09%, purple), EBV BMF1 GLC- (~0.06%, red), LMP2 FLY- (0.02%, green), CMV pp65 NLV- (~0.006%, blue), or EBV BRLF1 YVL-specific T cells (~0.05%, brown) from one healthy donor were expanded simultaneously in a single culture using five relevant Ag-scaffolds and 25 Ag-scaffolds with irrelevant pMHC in 1/10 of the standard Ag-scaffold concentration. Specific T cells were marked with tetramer staining using combinatorial encoding. **(C)** Frequency and **(D)** absolute number of antigen-specific CD8<sup>+</sup> T cells before and after Ag-scaffold expansion. The data is representative of three independent experiments.

Supplementary Figure S3

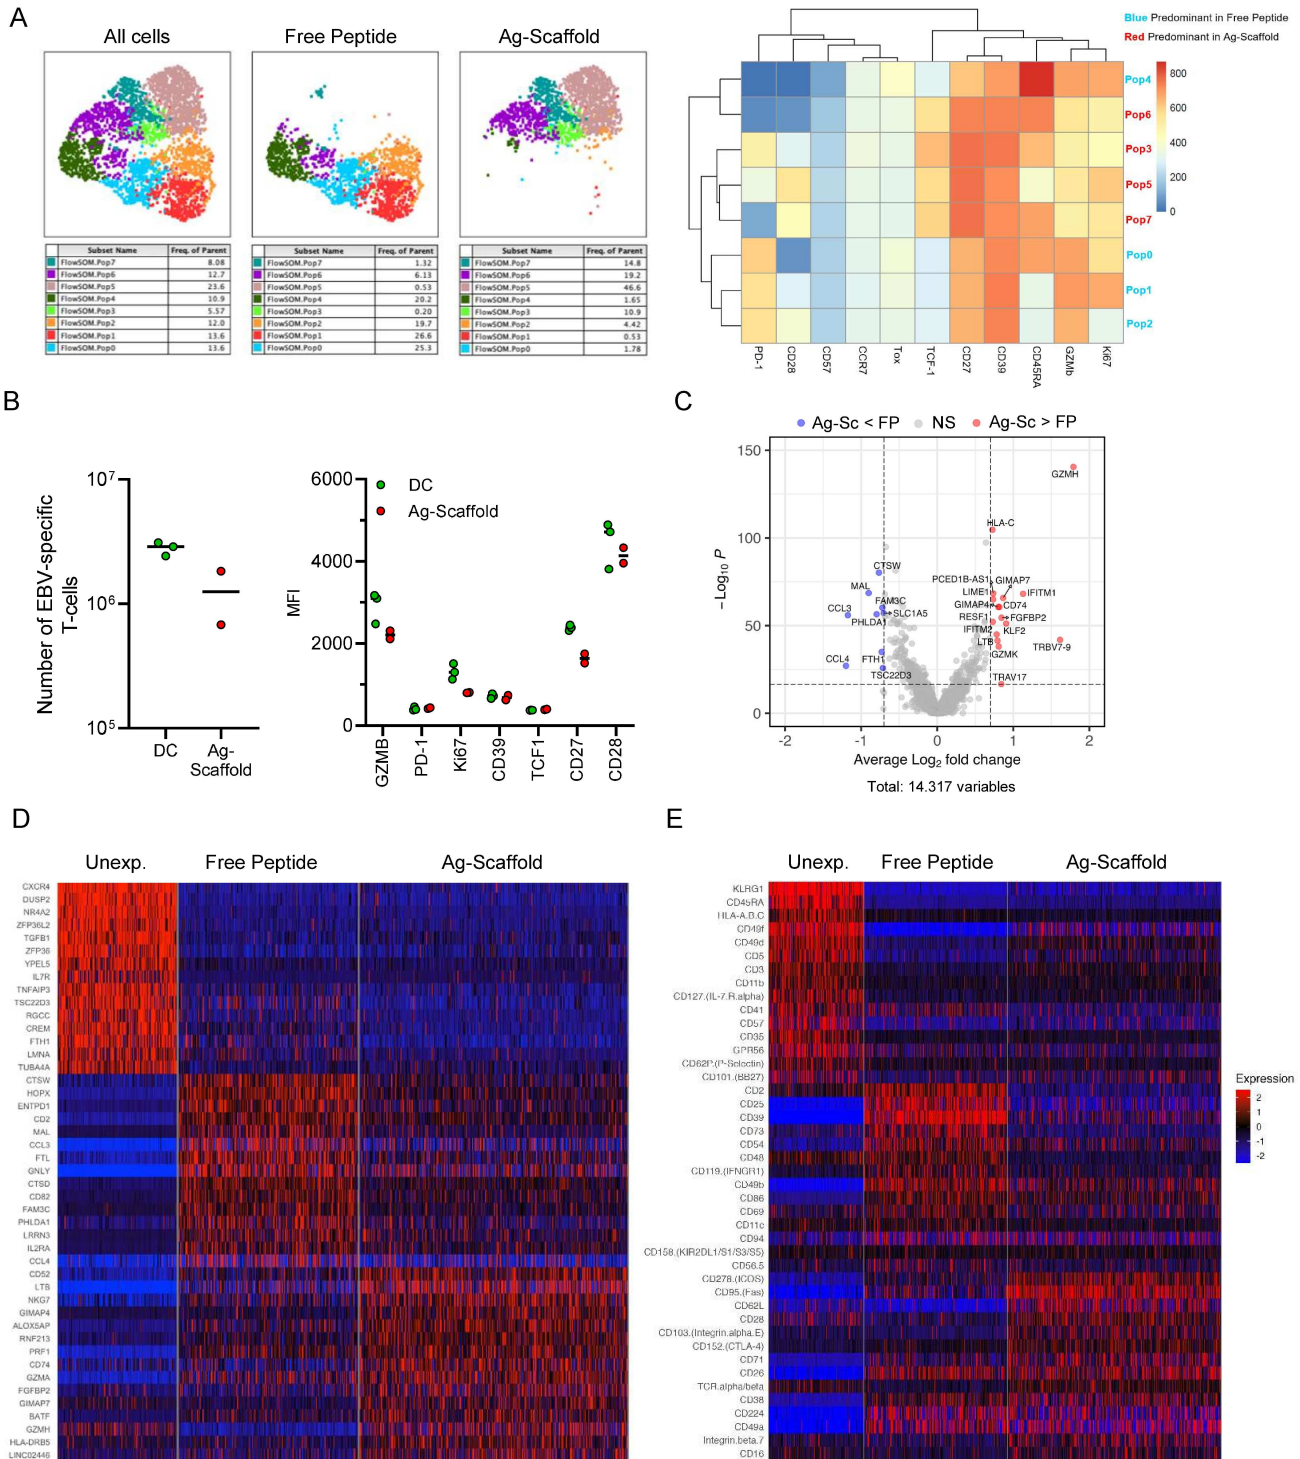

## Supplementary Figure S3

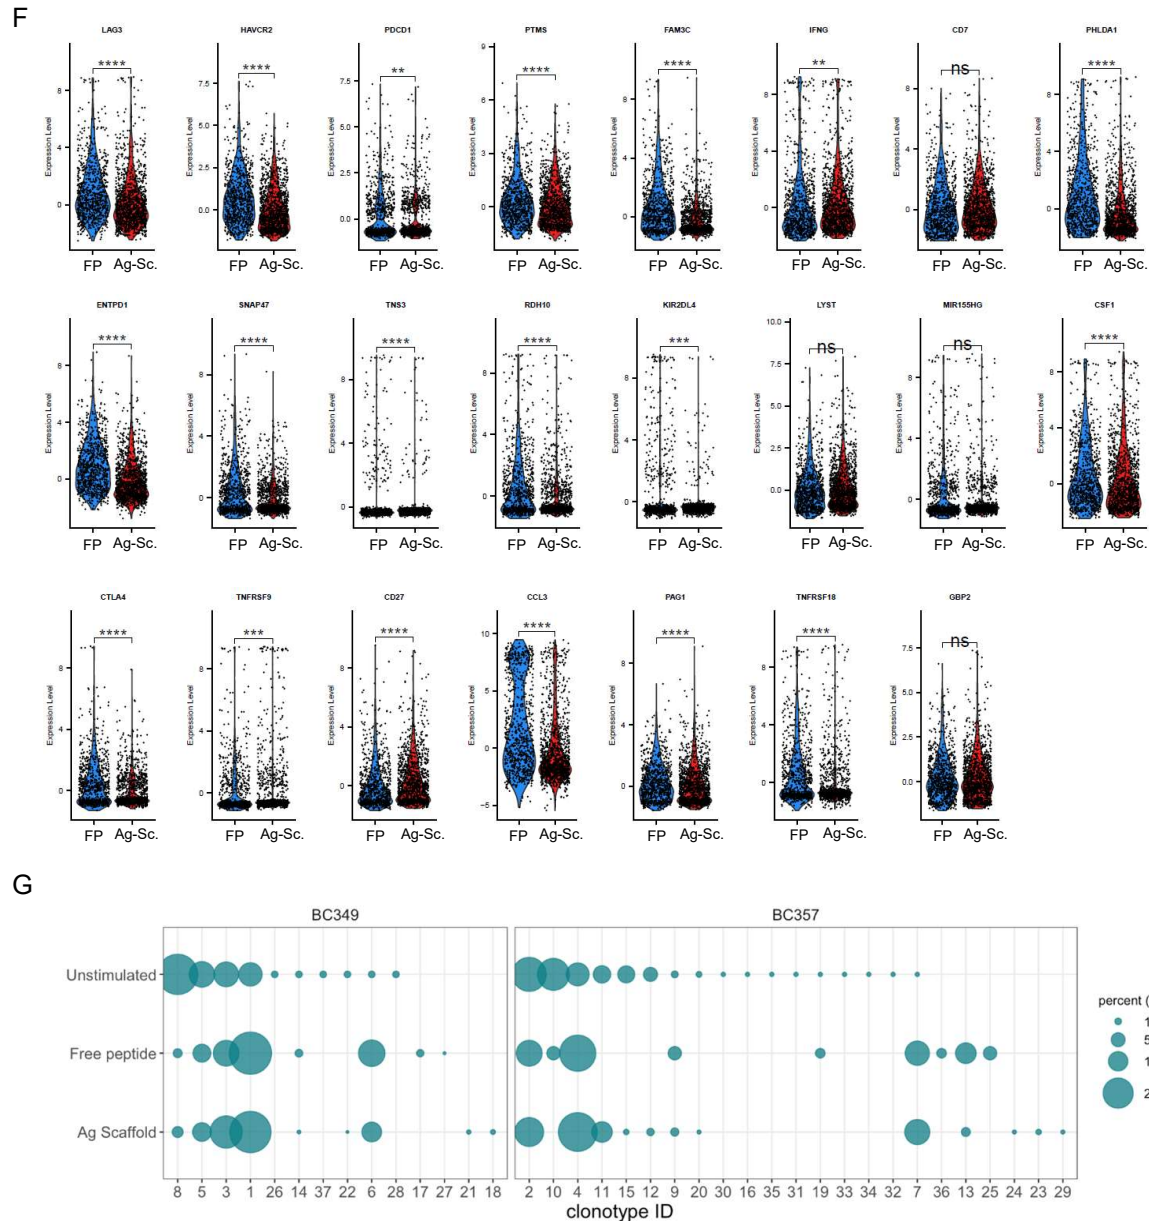

**Supplementary Figure S3 | Extended phenotypic, transcriptional and TCR clonal distribution analysis of Ag-scaffold and free peptide-expanded T-cells**

(A) FlowSOM unsupervised clustering analyses of HLA-A0101 CMV p50 VTE-specific T-cells expanded in duplicate from two healthy donors with either Ag-scaffold or free peptide. Specific T-cells were identified by tetramer-staining and these were characterized using an antibody panel covering various CD8<sup>+</sup> T-cell differentiation states (B) Number HLA-A0201 EBV BMLF1-specific T-cells following 10-day expansion with either dextran:pMHC:IL-2:IL-21 Ag-scaffold (n = 2) or peptide-pulsed autologous moDCs (n = 3) from healthy donor PBMCs and a phenotypic comparison of the resulting T-cell products (MFI) (C) Single-cell transcriptomic and analysis of unexpanded or Free Peptide- and Ag-Scaffold-expanded HLA-A0301 Flu NP IRL-specific and HLA-B0702 CMV pp65 TPR-specific T cells from two healthy donor BCs, respectively (D) Single-cell transcriptomic and (E) phenotypic analysis of unexpanded, free peptide-based or Ag-Scaffold-expanded HLA-A0301 Flu NP IRL-specific and HLA-B0702 CMV pp65 TPR-specific T cells from two healthy donors. (F) Expression of each individual gene (n = 23) that were included in calculation of the dysfunctional score in Free peptide- (FP) and Ag-scaffold (Ag-Sc)-expanded HLA-A0301 Flu NP IRL-specific and HLA-B0702 CMV pp65 TPR-specific T cells from two healthy donors. Mean expressions were compared in an unpaired, non-parametric Mann-Whitney test and p > 0.05, p < 0.01, p < 0.001 and p < 0.0001 is indicated as ns, \*\*, \*\*\* and \*\*\*\*, respectively. (G) TCR clonal distribution in the antigen-specific T cell population in unexpanded, Free peptide-based or Ag-Scaffold-expanded PBMCs from two healthy donors. Circle size corresponds to clonal frequency out of all clones detected.

## Supplementary Figure S4

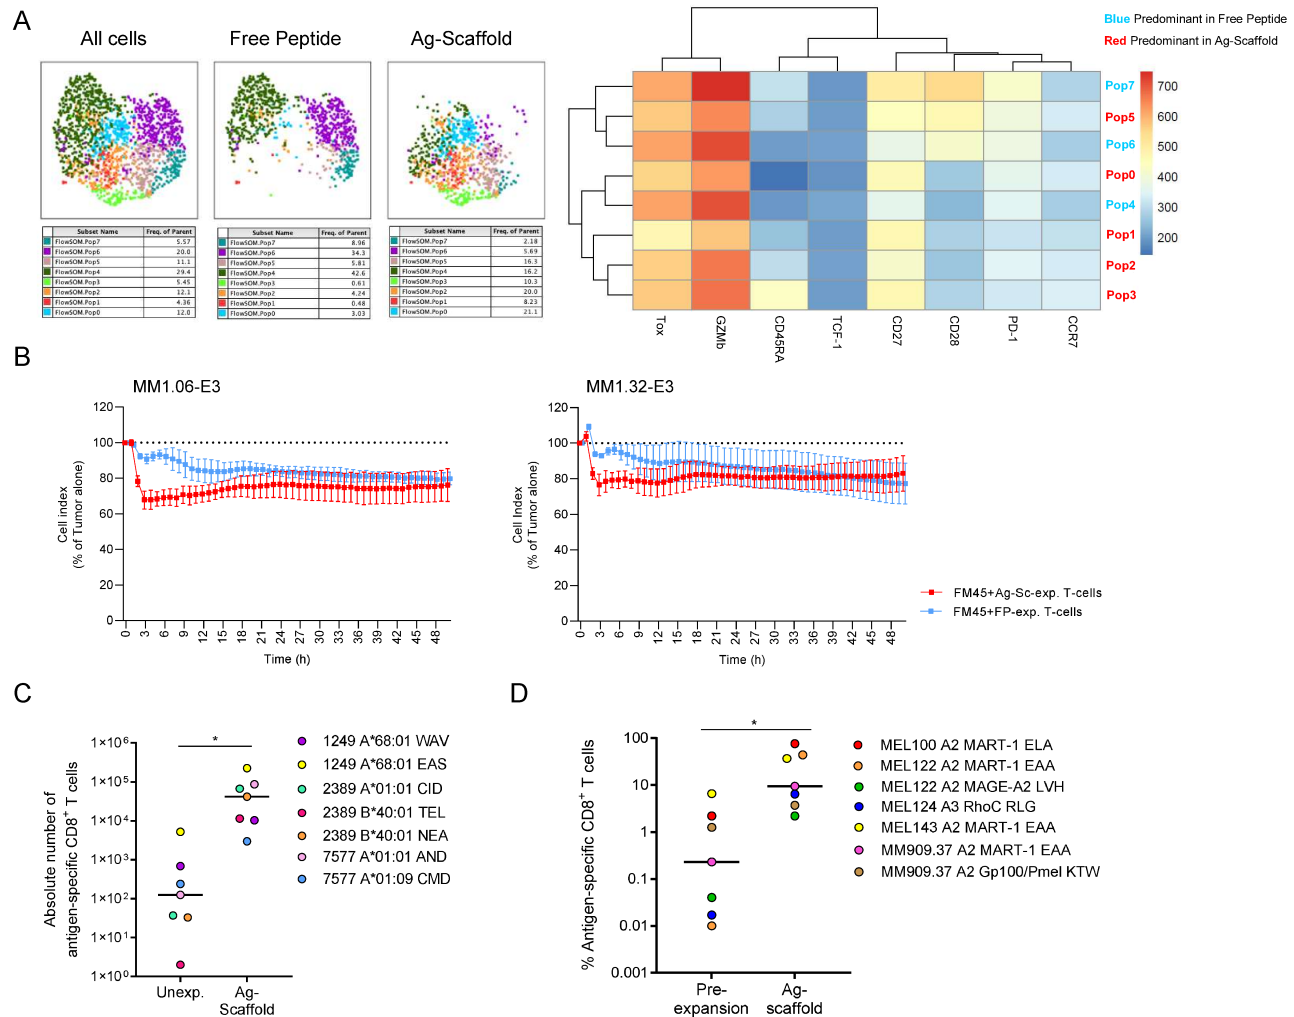

### Supplementary Figure S4 | Phenotypic and functional analysis of Ag-scaffold- and free peptide-expanded tumor-specific T-cells

**(A)** Identification of seven distinct populations among A0101 CMV p50 VTE-specific T-cells expanded in duplicate from two healthy donors with either Ag-scaffold or free peptide, using FlowSOM unsupervised clustering analyses. Specific T-cells were identified by tetramer-staining and these were characterized using an antibody panel covering various CD8<sup>+</sup> T-cell differentiation states **(B)** Survival of HLA-A0201-negative FM45 melanoma tumor cells (Cell Index as a relative measure of impedance presented as % of tumor alone) when co-cultured with Ag-scaffold (red) or free peptide-expanded (blue) tumor-specific T-cells from MM1.06- and 32-E3 in a 4:1 E:T ratio. **(C)** Number of neoantigen-specific T-cells before (Unexp.) and after Ag-scaffold-based expansion from PBMCs from three bladder cancer patients **(D)** Frequency of shared melanoma-antigen-specific T-cells in tumor digest/fragment from five metastatic melanoma patients, pre-expanded with  $\alpha$ CD3/CD28 beads (Pre-expansion) only or Ag-scaffold-expanded following pre-expansion.

## Supplementary Figure S5

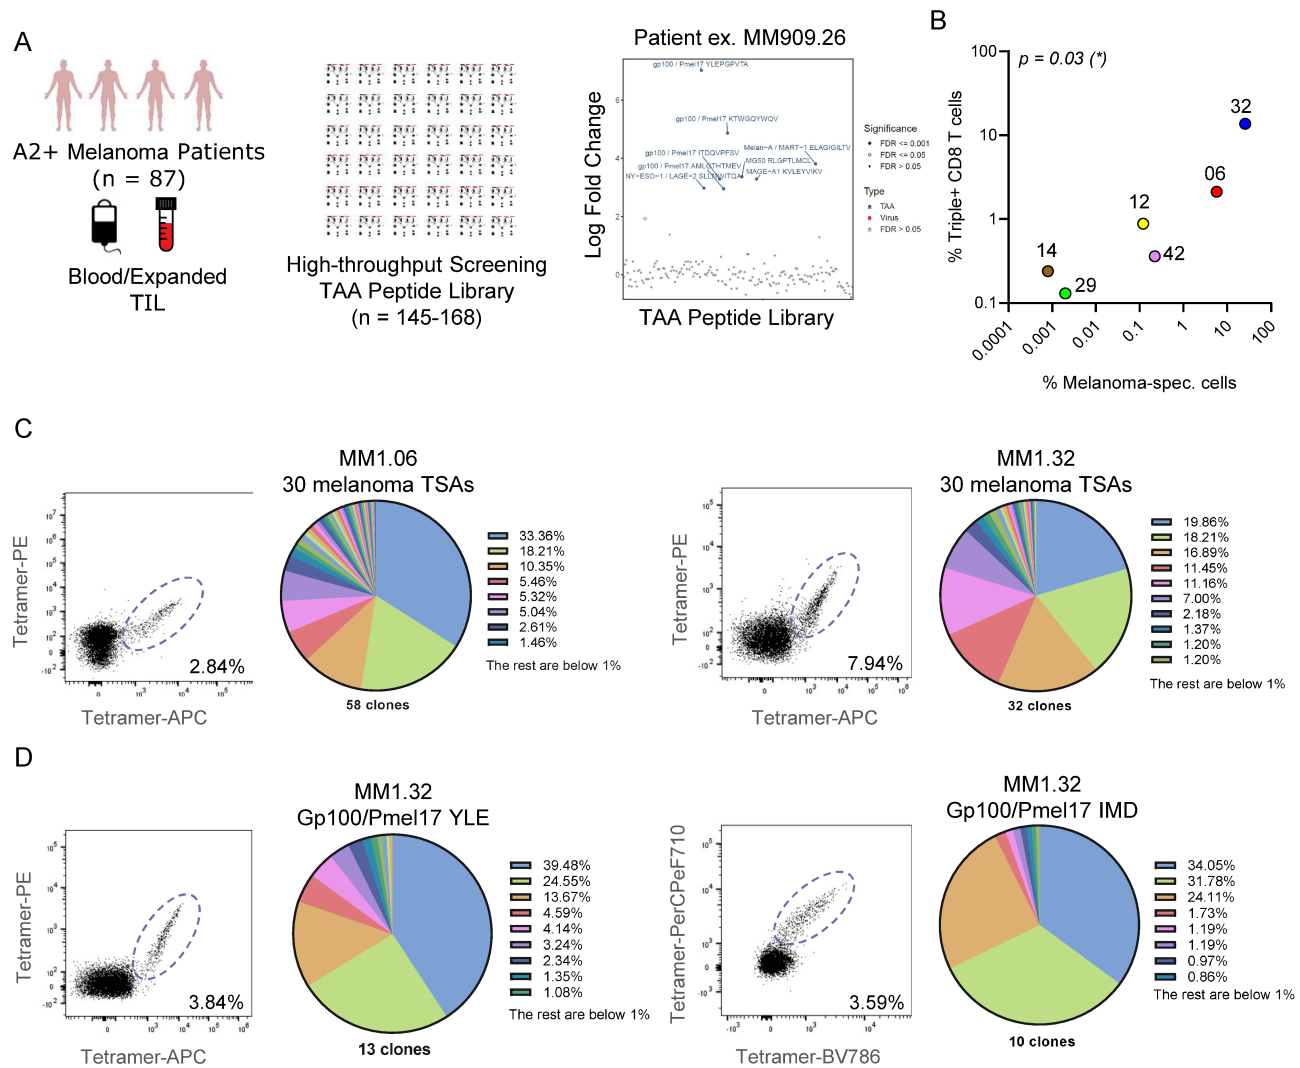

### Supplementary Figure S5 | Identification of TSA-specific T-cells in melanoma patients and TCR clonal distribution in Ag-scaffold-expanded TSA-specific T-cells

(A) TILs and PBMCs from a combined cohort of 87 HLA-A0201-positive patients with metastatic melanoma were screened for T-cell reactivity against a library of 145-168 HLA-A0201-restricted shared melanoma antigens using either combinatorial encoded or barcode-labeled pMHC multimers. (B) Correlation between the frequency of TNF $\alpha$ IFN $\gamma$ CD107a Triple+ and TSA-specific T-cells, p-value according to a Spearman's rank test. (C) TCR clonal distribution in Ag-scaffold-expanded MM1.06 (left) and MM1.32 (right) TSA-specific T-cells. In MM1.06 and -32, the top 8 and 10 clones contribute to 81.8 and 90.5% of the antigen-specific T-cell population, respectively. (D) TCR clonal distribution in Ag-scaffold-expanded MM1.32 HLA-A0201 Gp100/Pmel17 YLE- (left) and IMD-specific (IMD) T-cells.

## Supplementary Figure S6

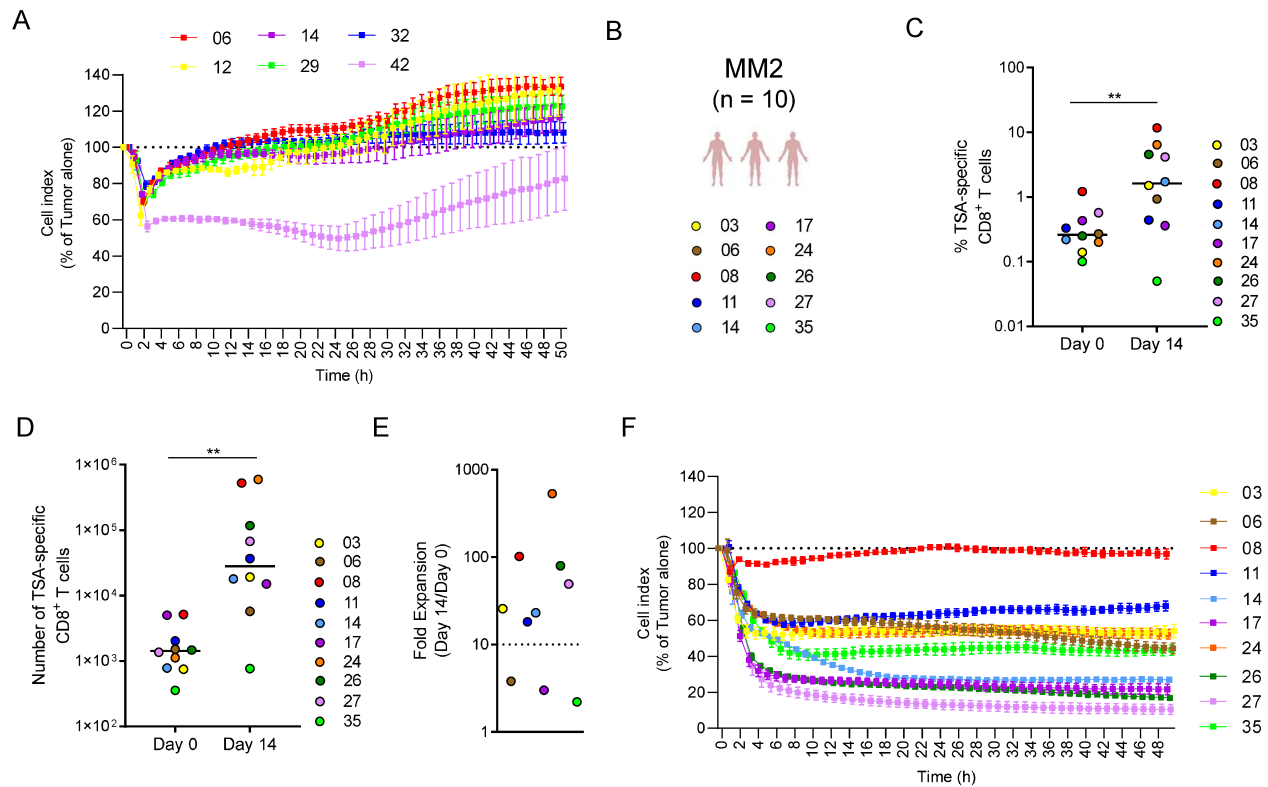

**Supplementary Figure S6 | Additional expansion of tumor-specific T-cells from patient PBMCs using the multi-targeting shared melanoma Ag-scaffold**

(A) Survival of A0201-negative FM45 melanoma tumor cells (Cell Index as a relative measure of impedance presented as % of tumor alone) when co-cultured with Ag-scaffold-expanded T-cells from the six melanoma patients (MM1) in a 4:1 effector:target ratio. (B) PBMCs from a cohort of ten patients with metastatic melanoma (MM2) were expanded with the multi-targeting shared melanoma Ag-scaffold, comprising 30 Ag-scaffolds carrying the 30 selected TSAs on HLA-A0201. (C) Frequency and (D) number of melanoma-specific T-cells pre- (Day 0) and post-expansion (Day 14). (E) Fold expansion (FE = Day 14/Day 0). (F) Survival of HLA-A0201-positive FM93/2 melanoma tumor cells when co-cultured with Ag-scaffold-expanded T-cells from ten melanoma patients (MM2) in E:T ratio 1:4.

## Supplementary Table 1

|               | ESTDAB/ECACC ID             | HLA Type (A, B, C)                           | TSA-expression                                                                                                                                                                                          |
|---------------|-----------------------------|----------------------------------------------|---------------------------------------------------------------------------------------------------------------------------------------------------------------------------------------------------------|
| <b>FM45</b>   | ESTDAB-011<br>ECACC13012410 | A6801, A2401<br>B5301, B5701<br>C0602, C0401 | <a href="https://www.culturecollections.org.uk/media/78959/13012410_fm-45_characterisation-data.pdf">https://www.culturecollections.org.uk/media/78959/13012410_fm-45_characterisation-data.pdf</a>     |
| <b>FM3</b>    | ESTDAB-007<br>ECACC13012407 | A0201<br>B0702, B4402<br>C0501               | <a href="https://www.culturecollections.org.uk/media/77636/13012407_fm-3_characterisation-data.pdf">https://www.culturecollections.org.uk/media/77636/13012407_fm-3_characterisation-data.pdf</a>       |
| <b>FM93/2</b> | ESTDAB-033<br>ECACC13012419 | A0201<br>B4001, B4402<br>C0304, B0501        | <a href="https://www.culturecollections.org.uk/media/78182/13012419_fm-93-2_characterisation-data.pdf">https://www.culturecollections.org.uk/media/78182/13012419_fm-93-2_characterisation-data.pdf</a> |

## Supplementary Table 2

**Antibody and SA-conjugate list**

## Tetramer staining:

CD3-FITC, SK7, BD 345764

CD8-BV480, RPA-T8, BD 566121

CD8-PECy5, RPA-T8, BD 561951

PE-SA, Biolegend 405204

APC-SA, Biolegend 405243

BV421-SA, BD 563259

PE-CF594-SA, BD 562284

PECy7-SA, Biolegend 405206

BV650-SA, BD 563855

BUV737-SA, BD 564293

BV786-SA, BD 563858

PerCPeF710-SA, eBioscience 46-4317-82

BUV395-SA, BD 564176

BV711-SA, BD 563262

## Dump channel staining:

CD4-FITC, BD 345768

CD14-FITC, BD 345784

CD19-FITC, BD 345776

CD40-FITC, Serotech MCA1590F

CD16-FITC, BD 335035

## Phenotype staining:

CD3-BV786, SK7, BD 0349301

CD8-BV480, RPA-T8, BD 566121

TOX-APC, REA473, Miltenyi Biotec  
5201005445

PD-1-BV421, EH12.1, BD 565024

GZMb-AF700, QA16A02, Biolegend  
B304753

CD28-BUV737, CD28.2, BD 612815

CD27-BV605, O323, Biolegend B338033

TCF-1-PE, S33.966, BD 564217

## okine staining:

CD107a-PE, H4A3, BD 555801

TNF $\alpha$ -PECy7, MAb11, Biolegend 502930IFN $\gamma$ -APC, 25723.11, BD 341117



Supplementary Table 3

| Figure 2A | ICOS        | OX40L | CD5  | IL-1        | IL-6 | IL-10 | IL-15 | IL-21       | IL-7 | IL-12p70 | CD47 |
|-----------|-------------|-------|------|-------------|------|-------|-------|-------------|------|----------|------|
| OX40L     | 43,8        |       |      |             |      |       |       |             |      |          |      |
| CD5       | 26,2        | 24,7  |      |             |      |       |       |             |      |          |      |
| IL-1      | <b>67,2</b> | 35,6  | 22,6 |             |      |       |       |             |      |          |      |
| IL-6      | 11,4        | 0,43  | 6,32 | 33          |      |       |       |             |      |          |      |
| IL-10     | 26,2        | 26,6  | 4,89 | 35,7        | 26,7 |       |       |             |      |          |      |
| IL-15     | 24,1        | 15,6  | 10,9 | 2,48        | 4,36 | 22,5  |       |             |      |          |      |
| IL-21     | <b>61,9</b> | 17,5  | 6,4  | 34,2        | 28,5 | 19,6  | 7,36  |             |      |          |      |
| IL-7      | 23,2        | 33,9  | 7,99 | 10,9        | 7,06 | 21,8  | 0,95  | 12,4        |      |          |      |
| IL-12p70  | 13,9        | 34,3  | 13   | <b>59,8</b> | 38,9 | 23,4  | 14    | 2,24        | 8,68 |          |      |
| CD47      | 20,5        | 35,4  | 25,2 | 41,7        | 37,3 | 0,48  | 6,49  | 7,23        | 3,21 | 50,6     |      |
| IL-2      | <b>77,4</b> | 41,8  | 22   | 51,1        | 23,8 | 53,8  | 26,5  | <b>82,3</b> | 10,7 | 9,91     | 30   |

| Figure 2B | ICOS        | OX40L | CD5  | IL-1      | IL-6 | IL-10 | IL-15 | IL-21       | IL-7 | IL-12p70 | CD47 |
|-----------|-------------|-------|------|-----------|------|-------|-------|-------------|------|----------|------|
| OX40L     | 22,6        |       |      |           |      |       |       |             |      |          |      |
| CD5       | 9,93        | 6,04  |      |           |      |       |       |             |      |          |      |
| IL-1      | <b>31,4</b> | 12,4  | 4,18 |           |      |       |       |             |      |          |      |
| IL-6      | 3,79        | 0,056 | 5,38 | 31,3      |      |       |       |             |      |          |      |
| IL-10     | 12,5        | 14,9  | 1,35 | 26,9      | 13,6 |       |       |             |      |          |      |
| IL-15     | 9,29        | 5,82  | 1,02 | 0,49      | 1,23 | 8,87  |       |             |      |          |      |
| IL-21     | <b>41,2</b> | 6,8   | 0,65 | 14,4      | 14,4 | 7,01  | 1,98  |             |      |          |      |
| IL-7      | 3,36        | 11,1  | 1,83 | 2,57      | 1,05 | 6,03  | 0,22  | 2,68        |      |          |      |
| IL-12p70  | 9,14        | 2,32  | 4,54 | <b>16</b> | 14,2 | 12    | 4,87  | 12,5        | 0,85 |          |      |
| CD47      | 9,63        | 26,7  | 4,97 | 11,4      | 18,8 | 0,24  | 1,62  | 3,23        | 0,98 | 9,79     |      |
| IL-2      | <b>38,2</b> | 19    | 3,95 | 16,4      | 8,92 | 19,4  | 7,38  | <b>30,9</b> | 0,69 | 2,97     | 5,71 |

| Figure 2C       | ICOS:<br>IL-2 | ICOS:<br>IL-21 | ICOS:<br>IL-1 | IL-2:<br>IL-21 | IL-1:<br>IL-12p70 |
|-----------------|---------------|----------------|---------------|----------------|-------------------|
| Ag-scaffold -B7 | 88,4          | 27             | 69,1          | <b>96</b>      | 34,6              |
| Ag-scaffold +B7 | 79,2          | 52             | 51,5          | 77,6           | 49,2              |

| Figure 2D       | ICOS:<br>IL-2 | ICOS:<br>IL-21 | ICOS:<br>IL-1 | IL-2:<br>IL-21 | IL-1:<br>IL-12p70 |
|-----------------|---------------|----------------|---------------|----------------|-------------------|
| Ag-scaffold -B7 | 15,7          | 7,49           | 5,84          | <b>25,8</b>    | 10,6              |
| Ag-scaffold +B7 | 4,4           | 16,3           | 13,9          | 20,1           | 22,3              |
